# Supplementary material for: Nucleosomes Correlate with In Vivo Progression Pattern of De Novo Methylation of p16 CpG Islands in Human Gastric Carcinogenesis
Source: PubMed Central journal article supplement (PMC3338478; doi:10.1371/journal.pone.0035928), 2012-04-25
Supplement: pone.0035928.s001.pdf [file pone.0035928.s001.pdf]

**Table S1.** *p16* Primer sets of quantitative PCR for nucleosome positioning

|          | <b>Primer sequence (5'→3')</b>                                       | <b>Amplicon size (bp)</b> |
|----------|----------------------------------------------------------------------|---------------------------|
| Primer-1 | F: taggg ggaca ctttc tagtc gtaca gg<br>R: ggtgt ttggt gtcac aggga aa | 130                       |
| Primer-2 | F: ttcc ctatg acacc aaaca cc<br>R: gcgtg ttga gtgcg ttcac tctg       | 119                       |
| Primer-3 | F: agtga acgca ctaa acacg c<br>R: gttgg caagg aagga ggact            | 119                       |
| Primer-4 | F: agtcct ccttc cttgc caac<br>R: tccga gcact tagcg aatgt g           | 114                       |
| Primer-5 | F: acttc agggg tgcca cattc<br>R: accct gtccc tcaaa tectct            | 124                       |
| Primer-6 | F: tcccc ttgcc tggaa agata c<br>R: ccacc ctctgg tgacc agc            | 121                       |
| Primer-7 | F: caccg gaga agaa agagg a<br>R: ccggc tccat gctgc tc                | 122                       |
| Primer-8 | F: agagg gggag agcag gca<br>R: cgccc gcacc tectc tac                 | 127                       |
| Primer-9 | F: ggggt cgggt agagg aggt<br>R: tgctc ccgct gcaga ccct               | 113                       |

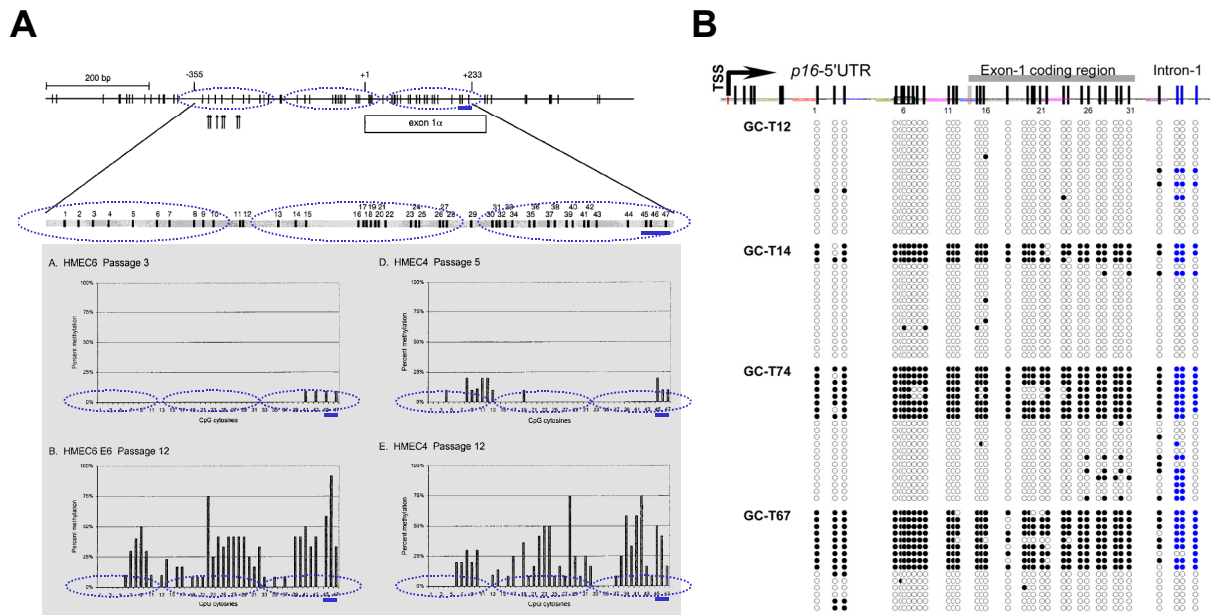

**Figure S1. Results from bisulfite clone sequencing of the *p16* CpG islands.** (A) The dynamic methylation status of individual CpG site in the whole *p16* CpG island during the immortalization of human mammary epithelial cell strains by stably HPV16 E6/E7 transfection as previously reported [14]. The information of nucleosome positioning (blue dash-line ovals) obtained in the present study was integrated into the published chart. Three seeding methylation sites were under-blue-lined. (B) The methylation status of the 392bp fragment of the *p16* CpG island in primary gastric carcinoma samples as previously reported [29]; Black dots (●) represent methylated-CpG sites open dots (○) represent unmethylated-CpG sites, blue dots (●) represent methylation at the three seeding methylation sites in intron-1. Each black bar represents a CpG site. TSS, transcription start site; the gray vertical bar, translation start site (atg).

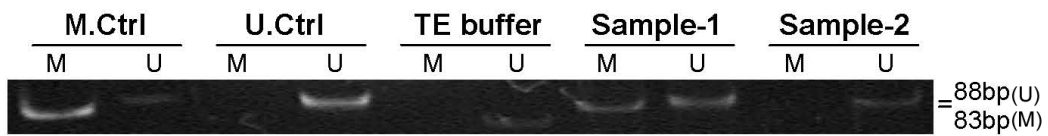

|      |     | 83bp MSP  |           |
|------|-----|-----------|-----------|
|      |     | (+)       | (-)       |
| sMSP | (+) | <b>33</b> | <b>22</b> |
|      | (-) | <b>1</b>  | <b>5</b>  |

( $p < 0.04$ )

**Figure S2. Results of sMSP were confirmed with those of the 83bp-MSP assay.** The top panel shows the number of PCR products that exhibited methylated- and unmethylated-*p16* of two representative GC samples as determined using the 83bp-MSP assay. The lower panel compares the detection of methylated-*p16* in 61 gastric tissue samples using the 83bp-MSP and sMSP assays. The table indicated that the results of the 83bp-MSP correlated with those of sMSP significantly ( $p < 0.04$ ).
