# Supplementary material for: Nucleosomes Correlate with In Vivo Progression Pattern of De Novo Methylation of p16 CpG Islands in Human Gastric Carcinogenesis
Source: PubMed Central journal article supplement (PMC3338478; doi:10.1371/journal.pone.0035928), 2012-04-25
Supplement: pone.0035928.s003.pdf [file pone.0035928.s003.pdf]

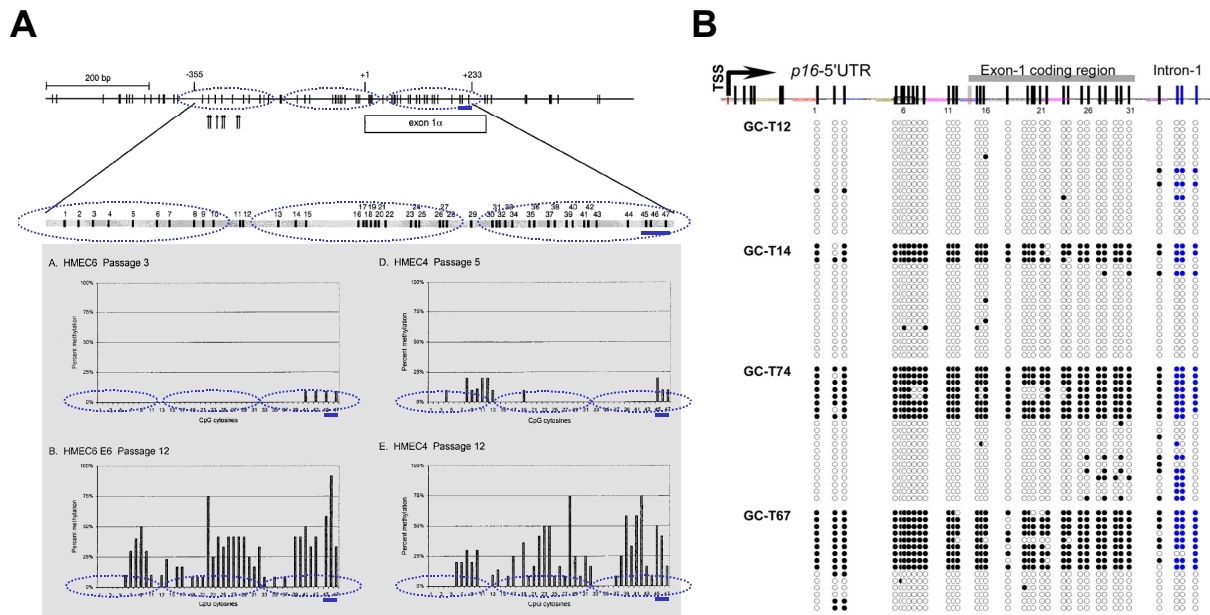

**Figure S1. Results from bisulfite clone sequencing of the *p16* CpG islands. (A)** The dynamic methylation status of individual CpG site in the whole *p16* CpG island during the immortalization of human mammary epithelial cell strains by stably HPV16 E6/E7 transfection as previously reported [14]. The information of nucleosome positioning (blue dash-line ovals) obtained in the present study was integrated into the published chart. Three seeding methylation sites were under-blue-lined. **(B)** The methylation status of the 392bp fragment of the *p16* CpG island in primary gastric carcinoma samples as previously reported [29]; Black dots (●) represent methylated-CpG sites open dots (○) represent unmethylated-CpG sites, blue dots (●) represent methylation at the three seeding methylation sites in intron-1. Each black bar represents a CpG site. TSS, transcription start site; the gray vertical bar, translation start site (atg).
